# Supplementary figures and images for: Daily Light Exposure Patterns Reveal Phase and Period of the Human Circadian Clock
Source: PubMed Central journal article supplement — J Biol Rhythms. 2017 Apr 28;32(3):274–86. doi: 10.1177/0748730417696787 (PMC5476188; doi:10.1177/0748730417696787), 2017-04-28

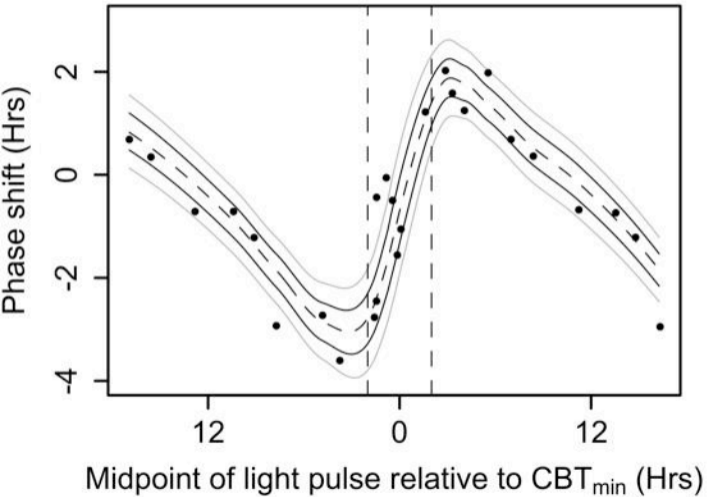

Supplement: Fig_S1.pdf [file Fig_S1.pdf]

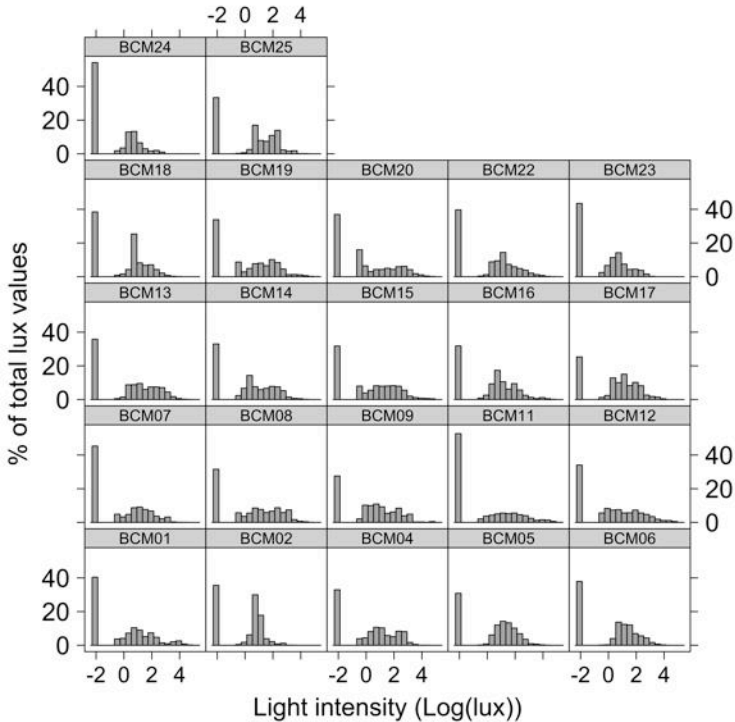

Supplement: Fig_S2.pdf [file Fig_S2.pdf]

% of lux values measured after sunset

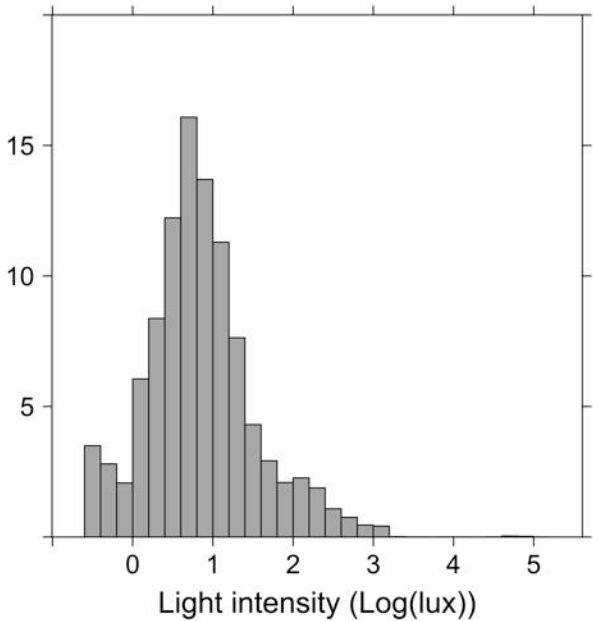

Supplement: Fig_S3.pdf [file Fig_S3.pdf]
